# Supplementary material for: Phytochemicals Identification and Bioactive Compounds Estimation of Artemisia Species Grown in Saudia Arabia
Source: Metabolites. 2023 Mar 17;13(3):443. doi: 10.3390/metabo13030443 (PMC10053057; doi:10.3390/metabo13030443)
Supplement: Supplementary file 1 [file metabolites-13-00443-s001.zip › metabolites-2262479-supplementary.pdf]

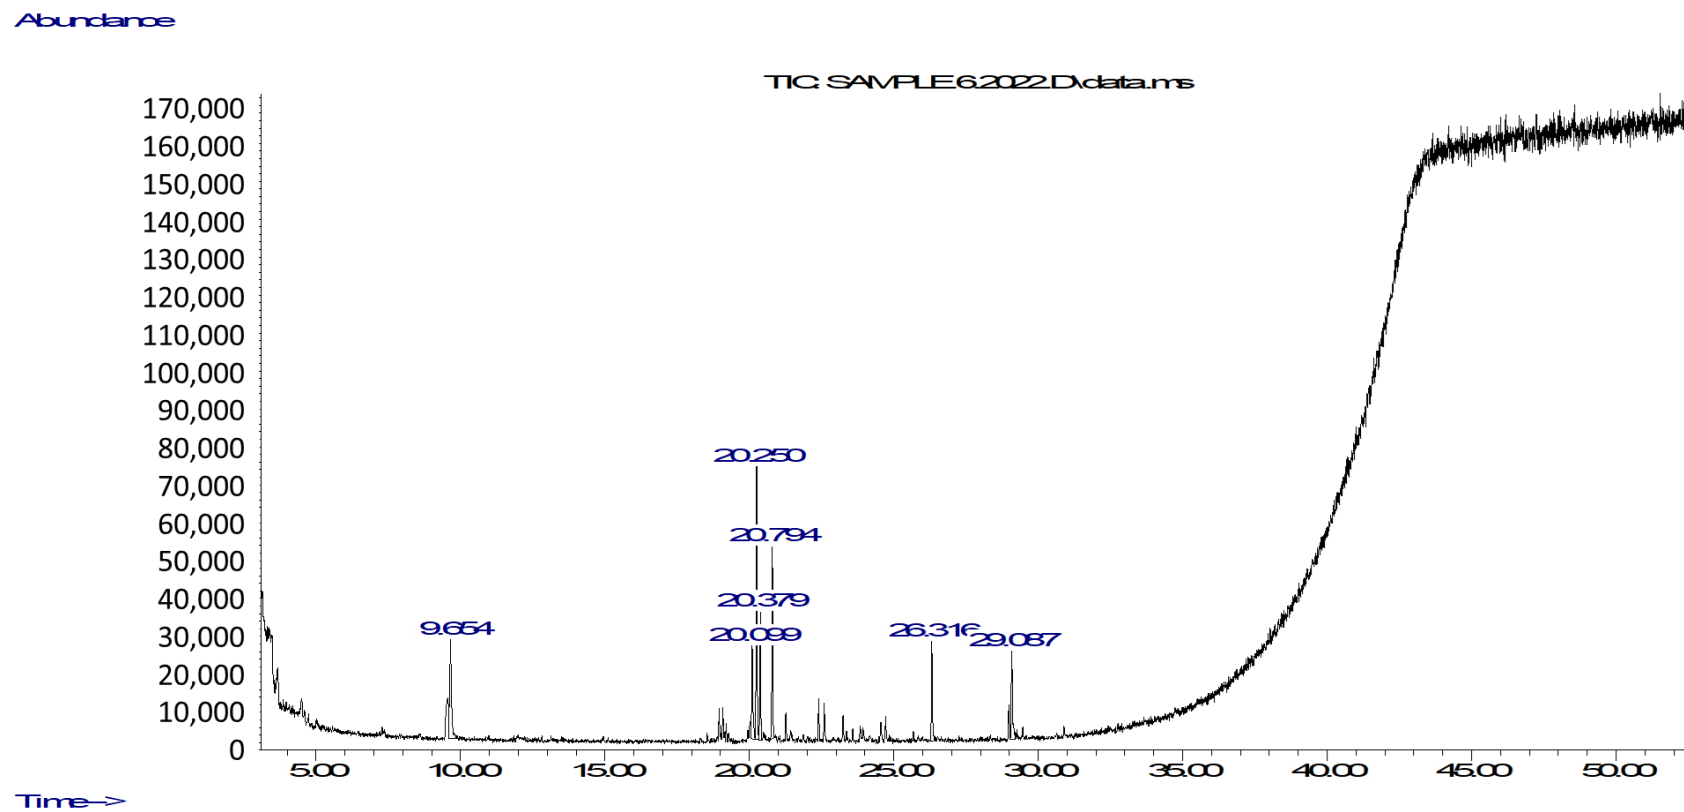

Figure S1. GC-MS chromatogram of leaf extract of *Artemisia monosperma*.

Abundance

TIC: SAMPLE N07.D\data.ms

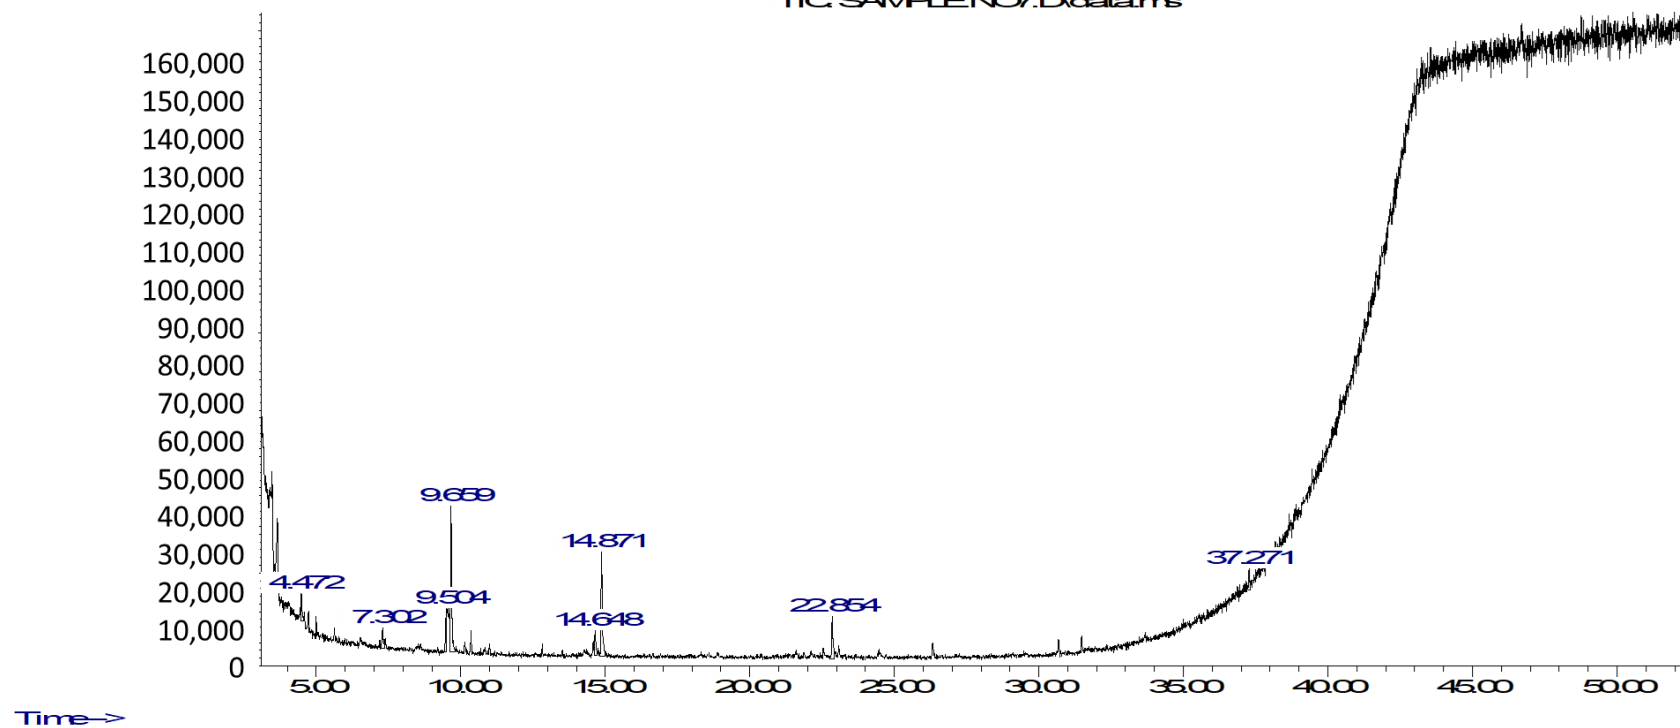

Figure S2. GC-MS chromatogram of leaf extract of *Artemisia sieberi*.

Abundance

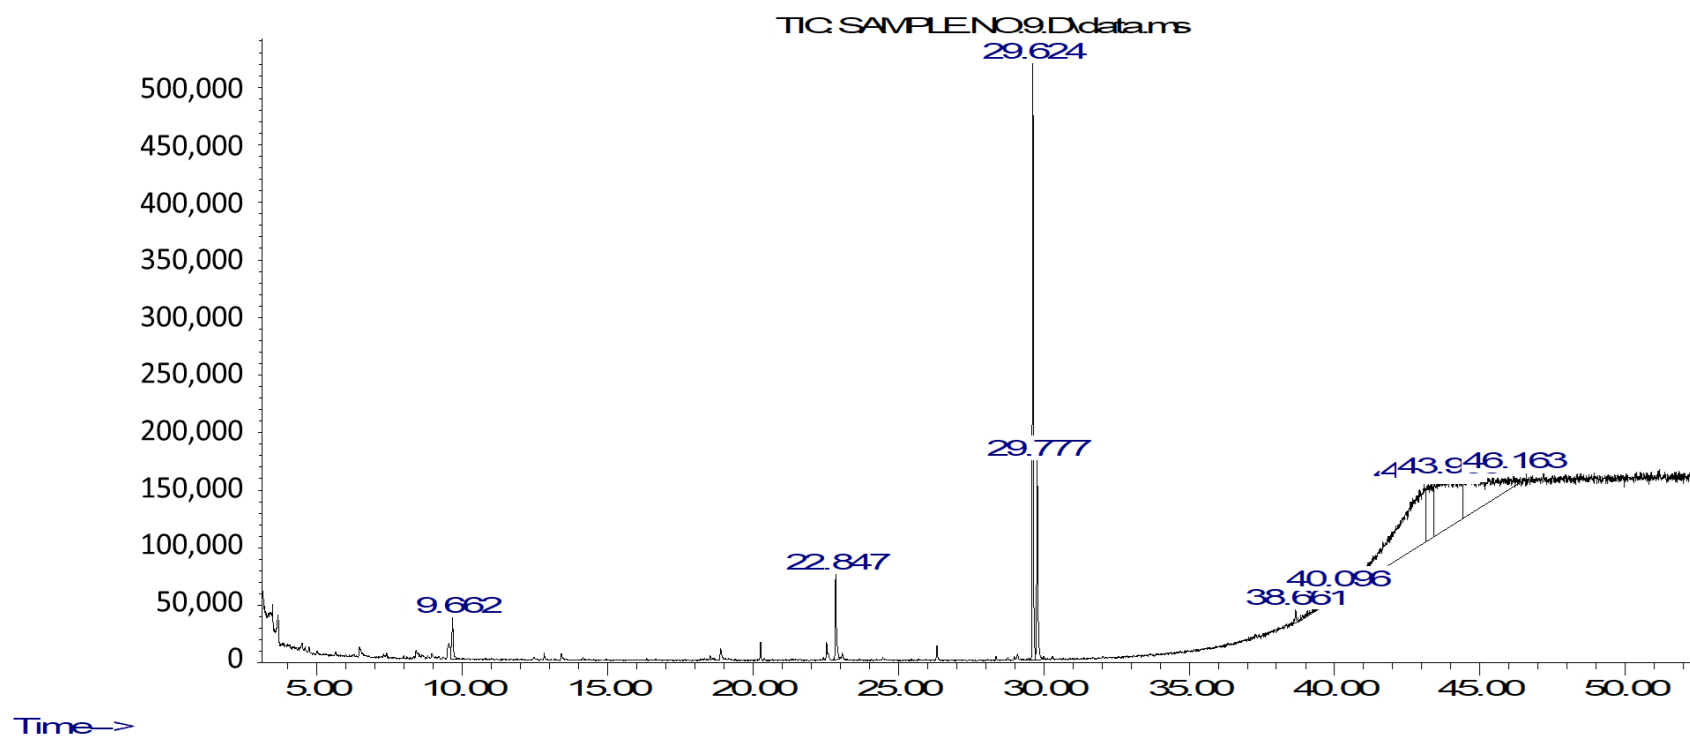

Figure S3. GC-MS chromatogram of leaf extract of *Artemisia judaica*.

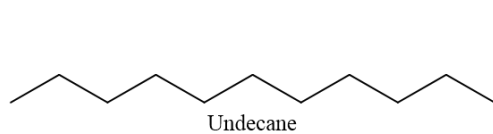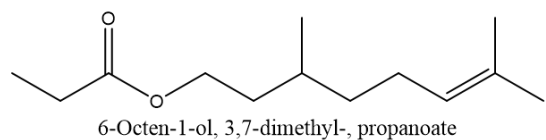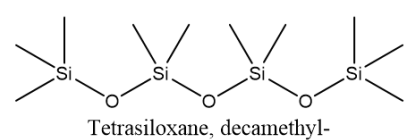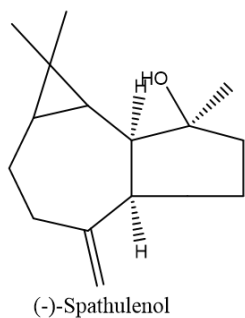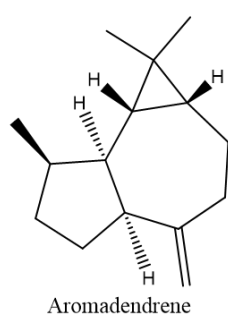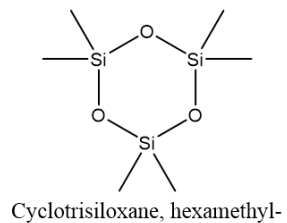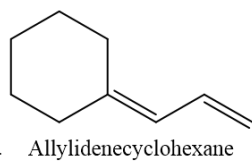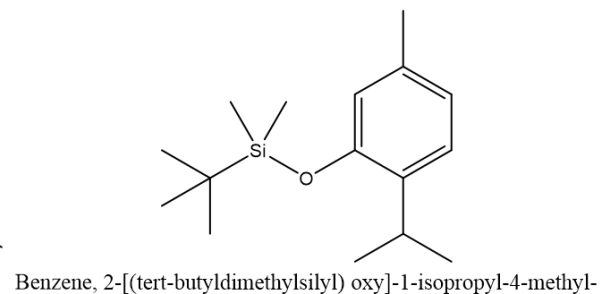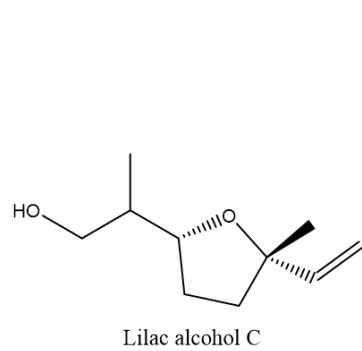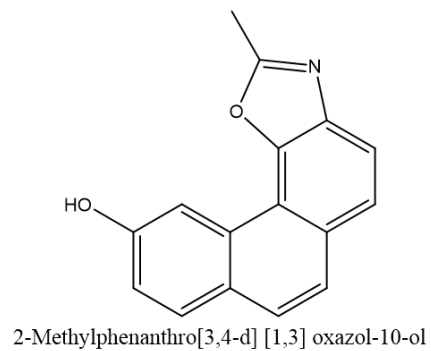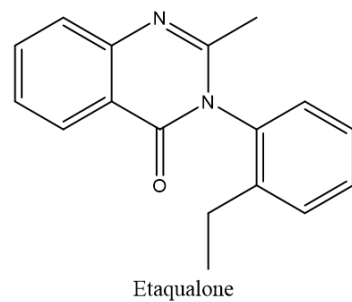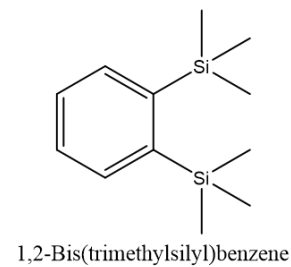

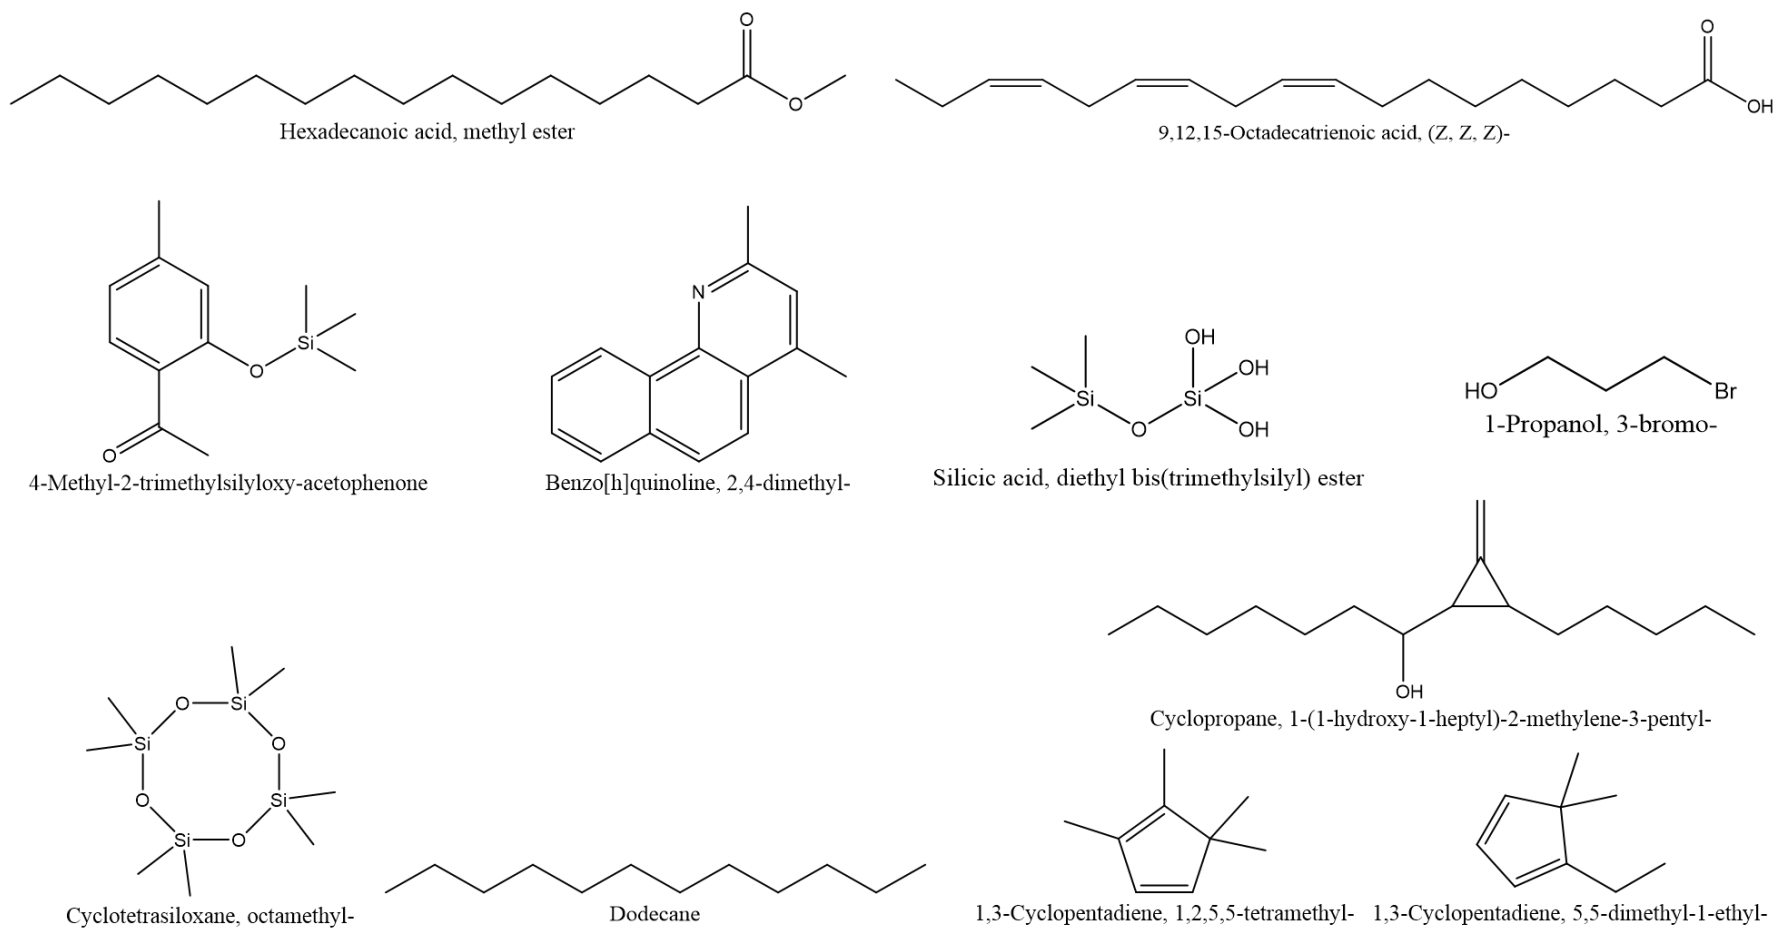

**Figure S4.** Chemical structures of identified phytochemical compounds from leaf extract of different species (*A. monosperma*, *A. judaica* and *A. sieberi*) of *Artemisia*.
